# Supplementary material for: Association of body mass index with morbidity in patients hospitalised with COVID-19
Source: PubMed Central journal article supplement — BMJ Open Respir Res. 2021 Aug 20;8(1):e000970. doi: 10.1136/bmjresp-2021-000970 (PMC8382668; doi:10.1136/bmjresp-2021-000970), 2021-08-20

## **Association of Body Mass Index With Morbidity in Patients Hospitalized with COVID-19**

Maria Plataki, MD PhD; Di Pan, DO; Parag Goyal, MD, MSc; Katherine L. Hoffman, MS; Jacky Man Kwan Choi, MPH; Hao Huang, BS; Monika M. Safford, MD; Edward J. Schenck, MD MSc

### **Online Supplement**

| Lab Value (Highest Value)              | Underweight (BMI < 18.5 kg/m <sup>2</sup> )<br>N = 5 | Normal Weight (BMI 18.5 - 24.9 kg/m <sup>2</sup> )<br>N = 101 | Overweight (BMI 25.0 - 29.9 kg/m <sup>2</sup> )<br>N = 130 | Obese (BMI 30.0 - 39.9 kg/m <sup>2</sup> )<br>N = 129 | Morbidly Obese (BMI > 40.0 kg/m <sup>2</sup> )<br>N = 20 |
|----------------------------------------|------------------------------------------------------|---------------------------------------------------------------|------------------------------------------------------------|-------------------------------------------------------|----------------------------------------------------------|
| White Blood Cell (10 <sup>3</sup> /uL) | 10 (8 - 15)                                          | 14 (9 - 19)                                                   | 13 (10 - 18)                                               | 13 (9 - 16)                                           | 12 (9 - 14)                                              |
| Missing                                | 0                                                    | 1                                                             | 1                                                          | 2                                                     | 0                                                        |
| Platelet (10 <sup>3</sup> /uL)         | 202 (139 - 306)                                      | 282 (193 - 358)                                               | 297 (228 - 374)                                            | 278 (217 - 350)                                       | 262 (211 - 302)                                          |
| Missing                                | 0                                                    | 1                                                             | 1                                                          | 4                                                     | 0                                                        |
| Creatinine (mg/dL)                     | 1.14 (1.01 - 2.82)                                   | 1.31 (0.88 - 2.16)                                            | 1.40 (0.87 - 2.49)                                         | 1.35 (0.92 - 2.63)                                    | 1.37 (1.08 - 2.31)                                       |
| Missing                                | 0                                                    | 1                                                             | 2                                                          | 3                                                     | 0                                                        |
| Alanine Aminotransferase (U/L)         | 29 (29 - 274)                                        | 46 (23 - 82)                                                  | 49 (28 - 86)                                               | 47 (31 - 82)                                          | 71 (51 - 93)                                             |
| Missing                                | 0                                                    | 7                                                             | 3                                                          | 3                                                     | 0                                                        |
| Aspartate Aminotransferase (U/L)       | 86 (59 - 272)                                        | 62 (40 - 94)                                                  | 64 (40 - 98)                                               | 57 (42 - 94)                                          | 89 (70 - 180)                                            |
| Missing                                | 0                                                    | 9                                                             | 4                                                          | 6                                                     | 1                                                        |
| Bilirubin Total (mg/dL)                | 1.10 (0.60 - 1.20)                                   | 0.70 (0.50 - 1.50)                                            | 0.80 (0.50 - 1.15)                                         | 0.70 (0.50 - 1.08)                                    | 1.10 (0.60 - 1.50)                                       |
| Missing                                | 0                                                    | 4                                                             | 3                                                          | 3                                                     | 0                                                        |
| Glucose Level (mg/dL)                  | 170 (149 - 183)                                      | 186 (144 - 229)                                               | 176 (139 - 242)                                            | 170 (133 - 236)                                       | 162 (126 - 301)                                          |
| Missing                                | 0                                                    | 1                                                             | 2                                                          | 3                                                     | 0                                                        |
| Ferritin Level (ng/mL)                 | 2393 (1294 - 3832)                                   | 1447 (875 - 1990)                                             | 1535 (884 - 2023)                                          | 1260 (802 - 1838)                                     | 875 (807 - 1242)                                         |
| Missing                                | 1                                                    | 45                                                            | 57                                                         | 58                                                    | 8                                                        |
| Creatine Kinase (U/L)                  | 1143 (1143 - 1143)                                   | 160 (65 - 291)                                                | 223 (95 - 455)                                             | 138 (62 - 360)                                        | 460 (166 - 1028)                                         |
| Missing                                | 4                                                    | 39                                                            | 49                                                         | 50                                                    | 5                                                        |
| D-Dimer (ng/mL)                        | 2150 (961 - 3195)                                    | 1147 (550 - 3674)                                             | 1087 (531 - 3005)                                          | 2127 (597 - 8544)                                     | 909 (451 - 3718)                                         |
| Missing                                | 1                                                    | 36                                                            | 49                                                         | 57                                                    | 5                                                        |
| Lactate Dehydrogenase (U/L)            | 951 (712 - 1036)                                     | 545 (422 - 784)                                               | 574 (432 - 812)                                            | 592 (443 - 788)                                       | 647 (465 - 915)                                          |
| Missing                                | 2                                                    | 38                                                            | 46                                                         | 52                                                    | 7                                                        |
| C-Reactive Protein (mg/dL)             | 20 (12 - 22)                                         | 22 (15 - 29)                                                  | 25 (16 - 31)                                               | 24 (17 - 30)                                          | 27 (23 - 32)                                             |

|                                                  |                    |                    |                    |                    |                    |
|--------------------------------------------------|--------------------|--------------------|--------------------|--------------------|--------------------|
| Missing                                          | 2                  | 33                 | 49                 | 48                 | 5                  |
| Sedimentation Rate (mm/hr)                       | 79 (43 - 104)      | 78 (62 - 100)      | 89 (63 - 120)      | 85 (61 - 108)      | 91 (84 - 102)      |
| Missing                                          | 2                  | 54                 | 82                 | 82                 | 10                 |
| Fibrinogen (mg/dL)                               | NA (NA - NA)       | 601 (430 - 754)    | 680 (454 - 861)    | 677 (578 - 868)    | 638 (585 - 699)    |
| Missing                                          | 5                  | 58                 | 84                 | 86                 | 15                 |
| Procalcitonin (ng/mL)                            | 1 (0 - 6)          | 1 (0 - 8)          | 1 (0 - 2)          | 1 (0 - 2)          | 0 (0 - 4)          |
| Missing                                          | 1                  | 32                 | 44                 | 44                 | 5                  |
| Lab Value (Lowest Value)                         |                    |                    |                    |                    |                    |
| White Blood Cell ( $10^3/\mu\text{L}$ )          | 8.0 (7.5 - 12.2)   | 9.9 (6.4 - 13.5)   | 9.9 (7.1 - 12.4)   | 8.9 (6.8 - 12.1)   | 8.1 (7.5 - 9.6)    |
| Missing                                          | 0                  | 1                  | 1                  | 2                  | 0                  |
| Absolute Lymphocyte Count ( $10^3/\mu\text{L}$ ) | 0.80 (0.40 - 0.80) | 0.58 (0.30 - 0.83) | 0.80 (0.50 - 1.10) | 0.70 (0.48 - 0.90) | 0.90 (0.60 - 1.10) |
| Missing                                          | 0                  | 10                 | 17                 | 9                  | 0                  |
| Platelet $10^3/\mu\text{L}$                      | 201 (139 - 242)    | 217 (147 - 295)    | 250 (182 - 319)    | 229 (178 - 286)    | 212 (178 - 256)    |
| Missing                                          | 0                  | 1                  | 1                  | 4                  | 0                  |

Statistics presented: median (25th-75th percentile, IQR)

| Table S2. Ventilator Parameters of Intubated Patients with COVID-19 by Obesity Class with Number of Missing Values |                                                      |                                                              |                                                           |                                                      |                                                          |
|--------------------------------------------------------------------------------------------------------------------|------------------------------------------------------|--------------------------------------------------------------|-----------------------------------------------------------|------------------------------------------------------|----------------------------------------------------------|
| Values (Days 1, 3 and 7)                                                                                           | Underweight (BMI < 18.5 kg/m <sup>2</sup> )<br>N = 5 | Normal Weight (BMI 18.5 - 24.9 kg/m <sup>2</sup> )<br>N = 66 | Overweight (BMI 25.0 - 29.9 kg/m <sup>2</sup> )<br>N = 76 | Obese (BMI 30.0 - 39.9 kg/m <sup>2</sup> )<br>N = 97 | Morbidly Obese (BMI > 40.0 kg/m <sup>2</sup> )<br>N = 16 |
| PCO <sub>2</sub> (mmHg)                                                                                            |                                                      |                                                              |                                                           |                                                      |                                                          |
| PCO <sub>2</sub> Arterial 1                                                                                        | 42 (41 - 45)                                         | 42 (37 - 52)                                                 | 44 (38 - 53)                                              | 46 (40 - 53)                                         | 46 (40 - 49)                                             |
| Missing                                                                                                            | 0                                                    | 8                                                            | 4                                                         | 5                                                    | 0                                                        |
| PCO <sub>2</sub> Arterial 3                                                                                        | 32 (30 - 38)                                         | 44 (40 - 50)                                                 | 46 (41 - 54)                                              | 49 (42 - 53)                                         | 47 (42 - 49)                                             |
| Missing                                                                                                            | 2                                                    | 14                                                           | 7                                                         | 10                                                   | 3                                                        |
| PCO <sub>2</sub> Arterial 7                                                                                        | 56 (56 - 56)                                         | 46 (39 - 54)                                                 | 50 (42 - 57)                                              | 51 (45 - 58)                                         | 47 (43 - 54)                                             |
| Missing                                                                                                            | 4                                                    | 16                                                           | 18                                                        | 20                                                   | 3                                                        |
| PO <sub>2</sub> (mmHg)                                                                                             |                                                      |                                                              |                                                           |                                                      |                                                          |
| PO <sub>2</sub> Arterial 1                                                                                         | 138 (62 - 180)                                       | 96 (72 - 126)                                                | 93 (75 - 130)                                             | 90 (76 - 123)                                        | 95 (79 - 138)                                            |
| Missing                                                                                                            | 0                                                    | 7                                                            | 2                                                         | 2                                                    | 0                                                        |
| PO <sub>2</sub> Arterial 3                                                                                         | 68 (63 - 105)                                        | 78 (66 - 93)                                                 | 73 (65 - 90)                                              | 81 (70 - 99)                                         | 69 (64 - 77)                                             |
| Missing                                                                                                            | 2                                                    | 14                                                           | 5                                                         | 9                                                    | 2                                                        |
| PO <sub>2</sub> Arterial 7                                                                                         | 87 (87 - 87)                                         | 74 (63 - 85)                                                 | 72 (66 - 84)                                              | 74 (62 - 82)                                         | 72 (69 - 86)                                             |
| Missing                                                                                                            | 4                                                    | 16                                                           | 18                                                        | 18                                                   | 3                                                        |
| PEEP (cmH <sub>2</sub> O)                                                                                          |                                                      |                                                              |                                                           |                                                      |                                                          |
| PEEP 1                                                                                                             | 10.0 (8.0 - 10.0)                                    | 10.0 (8.0 - 10.0)                                            | 10.0 (10.0 - 12.0)                                        | 10.0 (10.0 - 12.0)                                   | 14.0 (10.0 - 15.0)                                       |
| Missing                                                                                                            | 0                                                    | 4                                                            | 2                                                         | 3                                                    | 1                                                        |
| PEEP 3                                                                                                             | 8.0 (8.0 - 9.0)                                      | 10.0 (8.0 - 12.0)                                            | 12.0 (8.0 - 12.0)                                         | 12.0 (10.0 - 14.0)                                   | 14.0 (10.0 - 15.0)                                       |
| Missing                                                                                                            | 2                                                    | 6                                                            | 5                                                         | 9                                                    | 3                                                        |
| PEEP 7                                                                                                             | 8.0 (7.0 - 9.0)                                      | 10.0 (8.0 - 13.0)                                            | 10.0 (8.0 - 12.0)                                         | 12.0 (8.0 - 14.0)                                    | 12.0 (10.0 - 14.5)                                       |
| Missing                                                                                                            | 3                                                    | 15                                                           | 15                                                        | 25                                                   | 5                                                        |
| Plateau Pressure (cmH <sub>2</sub> O)                                                                              |                                                      |                                                              |                                                           |                                                      |                                                          |
| Plateau Pressure 1                                                                                                 | 24.5 (21.2 - 27.8)                                   | 23.5 (20.0 - 27.0)                                           | 24.0 (21.0 - 28.0)                                        | 26.0 (21.0 - 30.0)                                   | 30.0 (27.0 - 30.0)                                       |
| Missing                                                                                                            | 3                                                    | 28                                                           | 24                                                        | 35                                                   | 7                                                        |
| Plateau Pressure 3                                                                                                 | 23 (22 - 24)                                         | 24 (19 - 27)                                                 | 24 (20 - 28)                                              | 25 (22 - 29)                                         | 27 (23 - 33)                                             |
| Missing                                                                                                            | 3                                                    | 31                                                           | 32                                                        | 32                                                   | 7                                                        |
| Plateau Pressure 7                                                                                                 | 44.0 (44.0 - 44.0)                                   | 27.0 (22.5 - 30.8)                                           | 26.0 (22.0 - 28.0)                                        | 24.0 (22.5 - 28.5)                                   | 27.0 (22.0 - 30.0)                                       |
| Missing                                                                                                            | 4                                                    | 40                                                           | 41                                                        | 58                                                   | 7                                                        |
| PaO <sub>2</sub> / FiO <sub>2</sub> Ratio                                                                          |                                                      |                                                              |                                                           |                                                      |                                                          |
| PaO <sub>2</sub> /FiO <sub>2</sub> Ratio 1                                                                         | 188 (152 - 207)                                      | 116 (84 - 160)                                               | 108 (91 - 146)                                            | 115 (84 - 151)                                       | 96 (62 - 129)                                            |
| Missing                                                                                                            | 0                                                    | 5                                                            | 1                                                         | 5                                                    | 1                                                        |
| PaO <sub>2</sub> /FiO <sub>2</sub> Ratio 3                                                                         | 134 (124 - 144)                                      | 128 (105 - 180)                                              | 148 (110 - 174)                                           | 140 (110 - 168)                                      | 103 (83 - 147)                                           |

|                                                |                    |                    |                    |                    |                    |
|------------------------------------------------|--------------------|--------------------|--------------------|--------------------|--------------------|
| Missing                                        | 3                  | 8                  | 5                  | 10                 | 2                  |
| PaO <sub>2</sub> /FiO <sub>2</sub> Ratio 7     | 200 (200 - 200)    | 141 (93 - 172)     | 138 (109 - 160)    | 142 (116 - 179)    | 154 (112 - 186)    |
| Missing                                        | 4                  | 14                 | 10                 | 22                 | 4                  |
| Tidal Volume per Predicted Body Weight (mL/Kg) |                    |                    |                    |                    |                    |
| Tidal Volume / PBW 1                           | 5.53 (5.29 - 5.95) | 6.74 (6.26 - 7.76) | 6.97 (6.15 - 8.38) | 7.34 (6.42 - 8.21) | 8.02 (7.43 - 9.66) |
| Missing                                        | 0                  | 4                  | 4                  | 5                  | 2                  |
| Tidal Volume / PBW 3                           | 5.29 (5.17 - 5.62) | 6.21 (5.95 - 6.82) | 6.68 (6.06 - 7.13) | 6.57 (6.03 - 7.03) | 7.02 (6.26 - 7.73) |
| Missing                                        | 2                  | 15                 | 13                 | 12                 | 5                  |
| Tidal Volume / PBW 7                           | 5.05 (5.05 - 5.05) | 6.43 (5.97 - 7.02) | 6.70 (6.15 - 7.49) | 6.83 (6.27 - 7.60) | 6.97 (6.76 - 7.30) |
| Missing                                        | 4                  | 33                 | 32                 | 45                 | 6                  |
| Static Compliance (mL/cmH <sub>2</sub> O)      |                    |                    |                    |                    |                    |
| Static Compliance 1                            | 29 (20 - 36)       | 30 (22 - 39)       | 29 (23 - 40)       | 28 (22 - 38)       | 29 (27 - 36)       |
| Missing                                        | 0                  | 5                  | 5                  | 7                  | 2                  |
| Static Compliance 3                            | 25 (24 - 29)       | 30 (24 - 38)       | 29 (23 - 39)       | 31 (22 - 39)       | 31 (23 - 35)       |
| Missing                                        | 2                  | 15                 | 13                 | 16                 | 5                  |
| Static Compliance 7                            | 11 (11 - 11)       | 25 (20 - 33)       | 31 (21 - 39)       | 28 (24 - 37)       | 25 (22 - 36)       |
| Missing                                        | 4                  | 34                 | 34                 | 48                 | 7                  |
| Driving Pressure (cmH <sub>2</sub> O)          |                    |                    |                    |                    |                    |
| Driving Pressure 1                             | 9.5 (8.8 - 10.2)   | 12.2 (10.0 - 16.0) | 14.0 (11.0 - 18.0) | 14.0 (11.0 - 19.0) | 15.0 (14.0 - 17.0) |
| Missing                                        | 3                  | 28                 | 24                 | 36                 | 7                  |
| Driving Pressure 3                             | 14.0 (13.0 - 15.0) | 12.0 (10.0 - 16.0) | 12.0 (10.0 - 15.2) | 13.0 (9.5 - 16.0)  | 15.5 (12.0 - 18.2) |
| Missing                                        | 3                  | 31                 | 32                 | 34                 | 8                  |
| Driving Pressure 7                             | 34.0 (34.0 - 34.0) | 15.0 (12.2 - 17.5) | 13.0 (11.0 - 17.0) | 13.0 (11.2 - 17.0) | 14.0 (8.0 - 16.0)  |
| Missing                                        | 4                  | 40                 | 41                 | 59                 | 7                  |
| Ventilatory Ratio                              |                    |                    |                    |                    |                    |
| Ventilatory Ratio 1                            | 1.27 (1.22 - 1.44) | 1.63 (1.24 - 2.18) | 1.88 (1.64 - 2.23) | 1.87 (1.54 - 2.49) | 2.21 (1.84 - 2.59) |
| Missing                                        | 0                  | 10                 | 7                  | 12                 | 3                  |
| Ventilatory Ratio 3                            | 1.44 (1.17 - 1.44) | 1.72 (1.43 - 2.10) | 2.03 (1.62 - 2.60) | 2.17 (1.73 - 2.65) | 2.22 (1.96 - 2.51) |
| Missing                                        | 2                  | 18                 | 11                 | 19                 | 6                  |
| Ventilatory Ratio 7                            | 0.99 (0.99 - 0.99) | 1.80 (1.52 - 2.34) | 2.19 (1.68 - 2.63) | 2.26 (1.88 - 2.64) | 2.39 (1.98 - 3.03) |
| Missing                                        | 4                  | 23                 | 26                 | 30                 | 5                  |

Statistics presented: median (25th-75th percentile, IQR)

| Outcome                            | Normal Weight<br>(BMI 18.5 - 24.9<br>kg/m <sup>2</sup> )<br>N = 104 | Overweight<br>(BMI 25.0 -<br>29.9 kg/m <sup>2</sup> )<br>N = 138 | Obese<br>(BMI 30.0 -<br>39.9 kg/m <sup>2</sup> )<br>N = 137 | Morbidly Obese<br>(BMI > 40.0<br>kg/m <sup>2</sup> )<br>N = 23 |
|------------------------------------|---------------------------------------------------------------------|------------------------------------------------------------------|-------------------------------------------------------------|----------------------------------------------------------------|
| Discharge to Home                  | 21 (20%)                                                            | 31 (22%)                                                         | 42 (31%)                                                    | 10 (43%)                                                       |
| Length of Stay                     | 26.5 (15.5 - 52.1)                                                  | 34.0 (20.6 - 50.9)                                               | 33.9 (15.6 - 54.2)                                          | 21.3 (14.3 - 48.1)                                             |
| Length of Stay<br>(Survivors Only) | 48.8 (29.2 - 69.9)                                                  | 40.9 (26.1 - 56.5)                                               | 41.9 (26.7 - 66.1)                                          | 27.1 (17.4 - 57.3)                                             |
| Tracheostomy                       | 32 (32%)                                                            | 47 (36%)                                                         | 50 (39%)                                                    | 5 (22%)                                                        |
| Vent-Free (28) Days                | 0 (0 - 9)                                                           | 0 (0 - 14)                                                       | 0 (0 - 12)                                                  | 0 (0 - 17)                                                     |
| Vent-Free (60) Days                | 0 (0 - 39)                                                          | 26 (0 - 46)                                                      | 23 (0 - 44)                                                 | 23 (0 - 49)                                                    |

Baseline values are presented as median (25th-75th percentile) for continuous variables and N (%) for categorical variables.

| BMI                   |                      | Normal | Underweight | Overweight  | Obese      | Morbidly Obese |
|-----------------------|----------------------|--------|-------------|-------------|------------|----------------|
| Discharge to Home     | Odds Ratio           | —      | 0.53        | 1.3         | 1.3        | 2.6            |
|                       | 95% CI <sup>1</sup>  | —      | 0.26 - 1.0  | 1.0 - 1.8   | 1.0 - 1.7  | 1.5 - 4.7      |
|                       | Q-value <sup>2</sup> |        | 0.079       | 0.072       | 0.1        | 0.004          |
| Length of Stay (Days) | Estimate             | —      | -7.8        | 2.6         | 3.5        | -1.5           |
|                       | 95% CI <sup>1</sup>  | —      | -16 - 0.23  | -0.73 - 5.9 | 0.03 - 7.0 | -7.8 - 4.8     |
|                       | Q-value              | —      | 0.11        | 0.17        | 0.11       | 0.64           |

<sup>1</sup> CI = Confidence Interval

<sup>2</sup> Q-value: False discovery rate correction for multiple testing

| BMI               |                      | Normal | Underweight | Overweight  | Obese      | Morbidly Obese |
|-------------------|----------------------|--------|-------------|-------------|------------|----------------|
| Discharge to Home | Odds Ratio           | —      | 0.55        | 1.1         | 0.83       | 1.1            |
|                   | 95% CI <sup>1</sup>  | —      | 0.26 - 1.1  | 0.80 - 1.4  | 0.61 - 1.1 | 0.63 - 2.2     |
|                   | Q-value <sup>2</sup> |        | 0.2         | 0.67        | 0.31       | 0.67           |
| Length of Stay    | Estimate             | —      | -7.5        | 2.7         | 4.3        | 0.85           |
|                   | 95% CI               | —      | -16 - 0.57  | -0.66 - 6.0 | 0.70 - 7.9 | -5.6 - 7.3     |
|                   | Q-value              |        | 0.23        | 0.29        | 0.1        | 0.95           |

<sup>1</sup> CI = Confidence Interval

<sup>2</sup> Q-value: False discovery rate correction for multiple testing

\* adjusted for age, sex and race only



| Table S6. Unadjusted Outcomes by Obesity Class in Intubated Cohort |        |             |             |            |                |
|--------------------------------------------------------------------|--------|-------------|-------------|------------|----------------|
| BMI                                                                | Normal | Underweight | Overweight  | Obese      | Morbidly Obese |
| VFD <sup>1</sup> (60 Days)                                         |        |             |             |            |                |
| Estimate                                                           | —      | 4.1         | 5.9         | 6          | 7.7            |
| 95% CI <sup>2</sup>                                                | —      | -15 - 23    | 0.36 - 11   | 0.46 - 12  | -2.1 - 17      |
| Q-value <sup>3</sup>                                               | —      | 0.68        | 0.075       | 0.075      | 0.16           |
| VFD (28 Days)                                                      |        |             |             |            |                |
| Estimate                                                           | —      | 4.3         | 1.7         | 1.1        | 3.6            |
| 95% CI                                                             | —      | -3.1 - 12   | -0.44 - 3.8 | -1.0 - 3.3 | -0.19 - 7.3    |
| Q-value                                                            | —      | 0.31        | 0.24        | 0.31       | 0.24           |
| Length of Stay                                                     |        |             |             |            |                |
| Estimate                                                           | —      | -24         | 4.6         | 2.8        | -6.4           |
| 95% CI                                                             | —      | -55 - 6.5   | -4.1 - 13   | -5.9 - 12  | -22 - 9.1      |
| Q-value                                                            | —      | 0.49        | 0.53        | 0.53       | 0.53           |
| Discharge to Home                                                  |        |             |             |            |                |
| Odds Ratio                                                         | —      | 1           | 1.1         | 1.7        | 3              |
| 95% CI                                                             | —      | 0.05 - 7.1  | 0.62 - 2.2  | 1.0 - 3.2  | 1.2 - 7.9      |
| Q-value                                                            | —      | >0.99       | 0.89        | 0.14       | 0.089          |
| Tracheostomy                                                       |        |             |             |            |                |
| Odds Ratio                                                         | —      | 0           | 1.2         | 1.4        | 0.59           |
| 95% CI                                                             | —      |             | 0.68 - 2.0  | 0.80 - 2.4 | 0.18 - 1.6     |
| Q-value                                                            | —      | 0.98        | 0.75        | 0.67       | 0.67           |

<sup>1</sup> VFD = Ventilator Free Days

<sup>2</sup> CI = Confidence Interval

<sup>3</sup> Q-value: False discovery rate correction for multiple testing

| Table S7. Partially Adjusted Outcomes by Obesity Class in Intubated Cohort* |        |             |            |            |                |
|-----------------------------------------------------------------------------|--------|-------------|------------|------------|----------------|
| BMI                                                                         | Normal | Underweight | Overweight | Obese      | Morbidly Obese |
| VFD <sup>1</sup> (60 Days)                                                  |        |             |            |            |                |
| Estimate                                                                    | —      | 0           | 3.9        | 3.2        | 0.29           |
| 95% CI <sup>2</sup>                                                         | —      | -18 - 18    | -1.4 - 9.1 | -2.2 - 8.6 | -9.3 - 9.9     |
| Q-value <sup>3</sup>                                                        |        | >0.99       | 0.42       | 0.42       | >0.99          |
| VFD (28 Days)                                                               |        |             |            |            |                |
| Estimate                                                                    | —      | 2.5         | 1          | 0.13       | 0.82           |
| 95% CI                                                                      | —      | -4.6 - 9.7  | -1.0 - 3.1 | -2.0 - 2.2 | -2.9 - 4.6     |
| Q-value                                                                     |        | 0.7         | 0.54       | 0.9        | 0.84           |
| Length of Stay                                                              |        |             |            |            |                |
| Estimate                                                                    | —      | -25         | 3.4        | 0.09       | -8.9           |
| 95% CI                                                                      | —      | -56 - 5.5   | -5.4 - 12  | -8.9 - 9.1 | -25 - 7.2      |
| Q-value                                                                     |        | 0.22        | 0.5        | 0.98       | 0.45           |
| Discharge to Home                                                           |        |             |            |            |                |
| Odds Ratio                                                                  | —      | 0.91        | 1          | 1.5        | 2.1            |
| 95% CI                                                                      | —      | 0.04 - 7.6  | 0.50 - 1.9 | 0.78 - 2.9 | 0.69 - 6.3     |
| Q-value                                                                     |        | 0.93        | 0.93       | 0.44       | 0.44           |
| Tracheostomy                                                                |        |             |            |            |                |
| Odds Ratio                                                                  | —      | 0           | 1.1        | 1.3        | 0.57           |
| 95% CI                                                                      | —      |             | 0.66 - 2.0 | 0.74 - 2.3 | 0.17 - 1.6     |
| Q-value                                                                     |        | 0.98        | 0.98       | 0.77       | 0.77           |

<sup>1</sup> VFD = Ventilator Free Days

<sup>2</sup> CI = Confidence Interval

<sup>3</sup> Q-value: False discovery rate correction for multiple testing

\* adjusted for age, sex and race only

| Table S8. Adjusted Length of Stay by Obesity Class Among Survivors in Admitted Cohort* |        |             |            |            |                |
|----------------------------------------------------------------------------------------|--------|-------------|------------|------------|----------------|
| BMI                                                                                    | Normal | Underweight | Overweight | Obese      | Morbidly Obese |
| Length of Stay (Days)                                                                  |        |             |            |            |                |
| Estimate                                                                               | —      | -5.7        | 1.7        | 5.2        | 1              |
| 95% CI <sup>1</sup>                                                                    | —      | -17 - 5.2   | -2.4 - 5.7 | 0.83 - 9.6 | -6.7 - 8.8     |
| Q-value <sup>2</sup>                                                                   |        | 0.77        | 0.91       | 0.20       | 0.95           |

<sup>1</sup> CI = Confidence Interval

<sup>2</sup> Q-value: False discovery rate correction for multiple testing

\* Adjusted for age, sex, race, diabetes, hypertension, chronic obstructive pulmonary disease, asthma, end stage renal disease, coronary artery diseases, heart failure, cerebrovascular accident and cancer

| Table S9. Adjusted Length of Stay by Obesity Class Among Survivors in Intubated Cohort* |        |             |            |           |                |
|-----------------------------------------------------------------------------------------|--------|-------------|------------|-----------|----------------|
| BMI                                                                                     | Normal | Underweight | Overweight | Obese     | Morbidly Obese |
| Length of Stay (Days)                                                                   |        |             |            |           |                |
| Estimate                                                                                | —      | -30         | -4.2       | -5.2      | -13            |
| 95% CI <sup>1</sup>                                                                     | —      | -85 - 24    | -17 - 8.3  | -18 - 7.8 | -36 - 9.7      |
| Q-value <sup>2</sup>                                                                    |        | 0.69        | 0.78       | 0.73      | 0.69           |

<sup>1</sup> CI = Confidence Interval

<sup>2</sup> Q-value: False discovery rate correction for multiple testing

\* Adjusted for age, sex, race, diabetes, hypertension, chronic obstructive pulmonary disease, asthma, end stage renal disease, coronary artery diseases, heart failure, cerebrovascular accident and cancer

Figure S1. Rolling weekly average number of intubations across body mass index (BMI) groups.

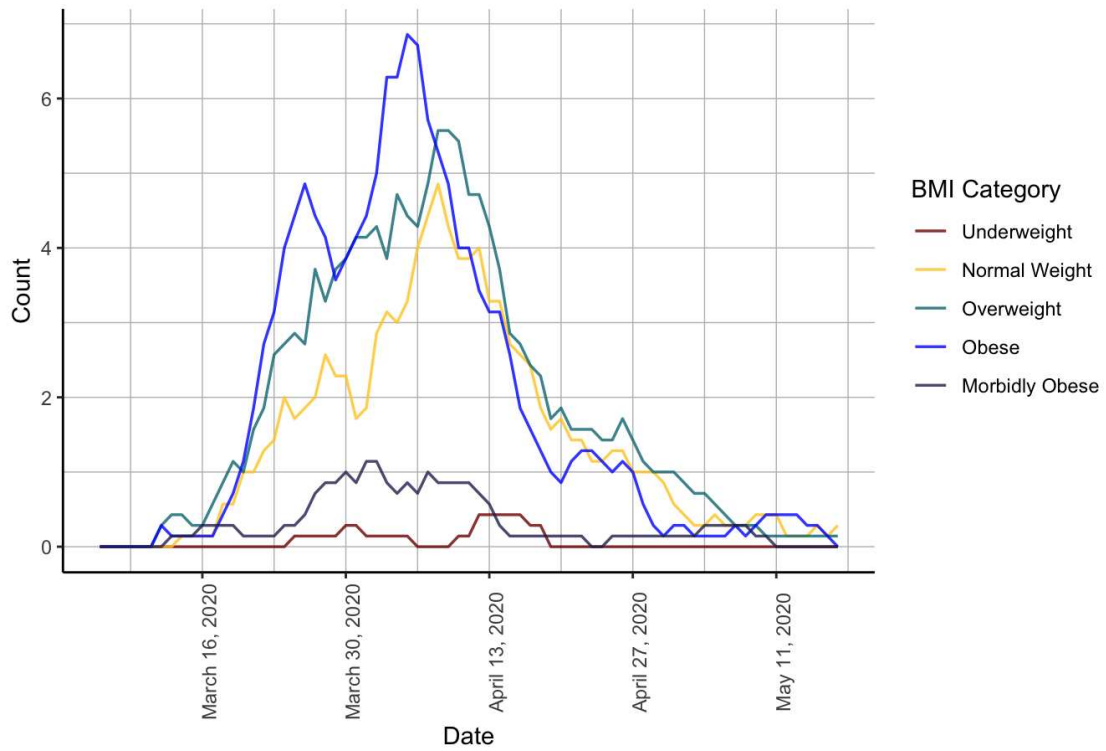

Supplement: bmjresp-2021-000970supp001.pdf [file bmjresp-2021-000970supp001.pdf]
